# Supplementary material for: Control of Coherent Light through Microperiodic Director Modulation in Nematic Films under Low-Voltage DC Electric Field
Source: Materials (Basel). 2023 Sep 1;16(17):6014. doi: 10.3390/ma16176014 (PMC10488426; doi:10.3390/ma16176014)
Supplement: Supplementary file 1 [file materials-16-06014-s001.zip]

Archive with 6 entries (6 files):
- 1.avi
- 2.avi
- 3.avi
- G.Hadjichristov_[Coh.V-shape-5CB]_Supplementary Materials.pdf
- Pics1.mp4
- Pics2.mp4
